# Supplementary material for: Enhanced diabetic wound healing by electrospun core–sheath fibers loaded with dimethyloxalylglycine
Source: Royal Society of Chemistry journal article supplement (doi:10.1039/c7tb02342a), 2017-12-01

Supporting information

SI Table1 Primer sequences used for qRT-PCR gene expression analysis

| Gene            | 5'-3'      | Primers                      |
|-----------------|------------|------------------------------|
| Collagen I      | Sense      | 5'-ATGCCGCGACCTCAAGATG-3'    |
|                 | Anti-sense | 5'-TGAGGCACAGACGGCTGAGTA-3'  |
| Collagen III    | Sense      | 5'-AGGTCCTGCGGGTAACT-3'      |
|                 | Anti-sense | 5'-ACTTTCACCCTTGACACCCTG-3'  |
| $\alpha$ -SMA   | Sense      | 5'-ACCCAGATTATGTTTGAGACC-3'  |
|                 | Anti-sense | 5'-CCGTCAGGCAGTTCGTAG-3'     |
| VEGF            | Sense      | 5'-CTTGTTTCAGAGCGGAGAAAGC-3' |
|                 | Anti-sense | 5'-ACATCTGCAAGTACGTTCGTT-3'  |
| VEGF-receptor1  | Sense      | 5'-AGGCTGCTGTAACGATGAAG-3'   |
|                 | Anti-sense | 5'-TATGTGCTGGCTTTGGTGAG-3'   |
| HIF-1 $\alpha$  | Sense      | 5'-TTCACCTGAGCCTAATAGTCC-3'  |
|                 | Anti-sense | 5'-CAAGTCTAAATCTGTGTCCTG-3'  |
| TGF- $\beta$ 1  | Sense      | 5'-GAGAAGCGGTACCTGAACCC-3'   |
|                 | Anti-sense | 5'-GGTTGCTGAGGTATCGCCAG-3'   |
| GAPDH           | Sense      | 5'-TGGATGGCCCCTCCGGGAAA-3'   |
|                 | Anti-sense | 5'-AGTGGGGACACGGAAGGCCA-3'   |
| SCF             | Sense      | 5'-CCTTAGGAATGACAGCAGTAGC-3' |
|                 | Anti-sense | 5'-AGCCAATTACAAGCGAAATGAG-3' |
| SDF-1 $\alpha$  | Sense      | 5'-GAGAGCCACATCGCCAGAG-3'    |
|                 | Anti-sense | 5'-TTTCGGGTCAATGCACACTTG-3'  |
| HSP-90 $\alpha$ | Sense      | 5'-GGACCAGGTTGCTAACTCCG-3'   |
|                 | Anti-sense | 5'-GGTCTTGCCCTCAAATTCCTT-3'  |

Fig. S1. Fiber diameter distribution of nanofibrous wound dressings.

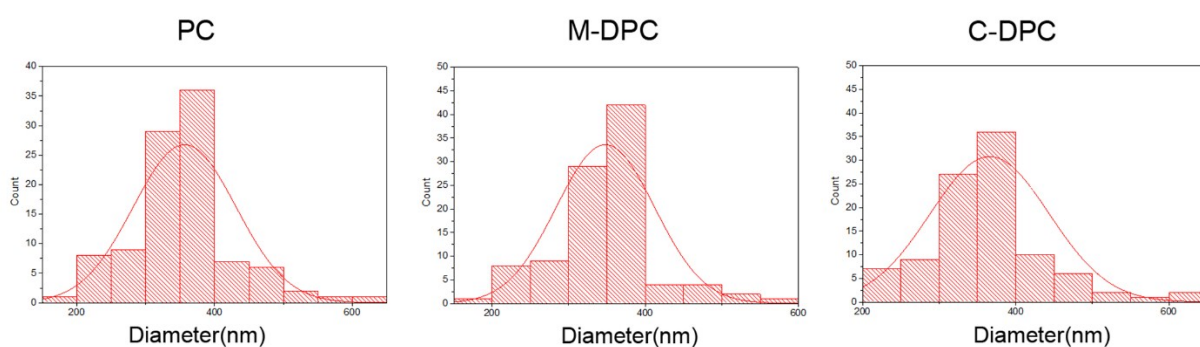

Fig. S2. Degradation of nanofibrous wound dressings for 7 days. A) Representative SEM images; B) Fiber diameter distribution.

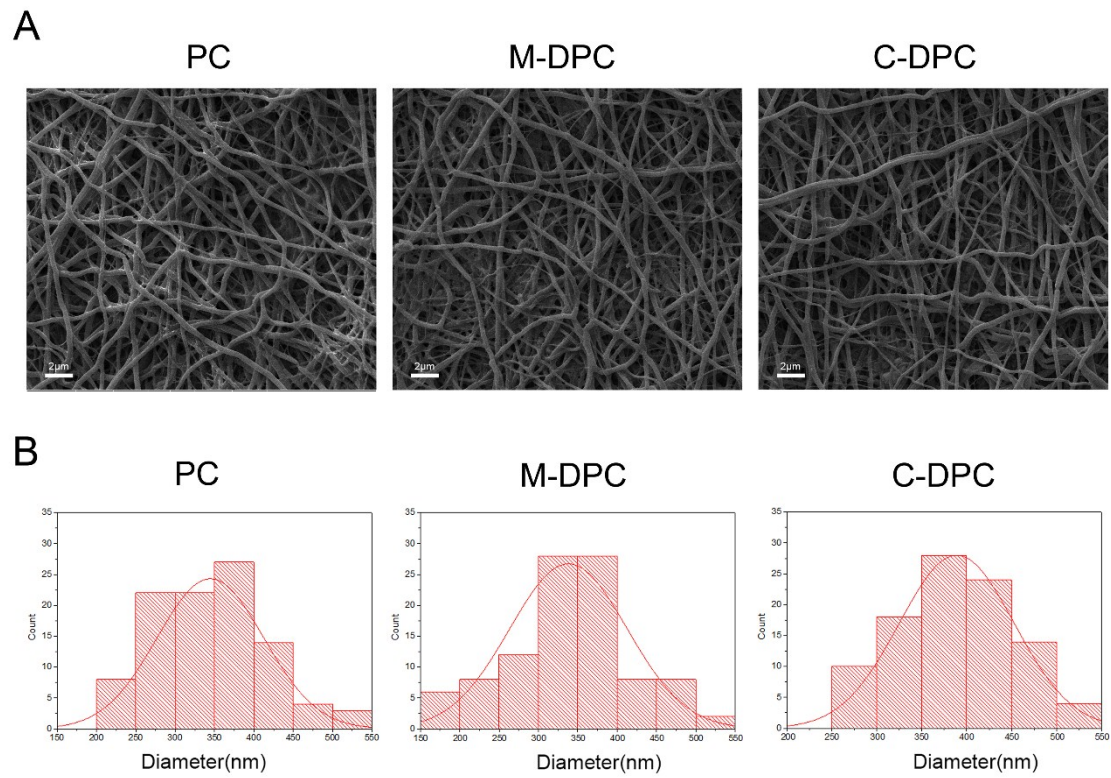

Supplement: c7tb02342a1.pdf [file c7tb02342a1.pdf]
